# Supplementary material
Source: publisher figshare collection journal article supplement (https://acs.figshare.com/ndownloader/files/10959818)
Supplement: Supplementary file 1 [file 10959818]

CRYST1   58.477   58.477   58.477  90.00  90.00  90.00 P 1           1
ATOM      1  N   ASP A   1     -10.818  26.924   2.345  0.00  0.00      A    N
ATOM      2  HT1 ASP A   1      -9.845  27.236   2.151  0.00  0.00      A    H
ATOM      3  HT2 ASP A   1     -11.255  27.405   3.157  0.00  0.00      A    H
ATOM      4  HT3 ASP A   1     -11.476  27.129   1.566  0.00  0.00      A    H
ATOM      5  CA  ASP A   1     -10.550  25.406   2.398  0.00  0.00      A    C
ATOM      6  HA  ASP A   1     -10.493  25.089   1.368  0.00  0.00      A    H
ATOM      7  CB  ASP A   1      -9.167  25.233   3.099  0.00  0.00      A    C
ATOM      8  HB1 ASP A   1      -9.307  25.417   4.185  0.00  0.00      A    H
ATOM      9  HB2 ASP A   1      -8.417  26.020   2.868  0.00  0.00      A    H
ATOM     10  CG  ASP A   1      -8.453  23.942   2.796  0.00  0.00      A    C
ATOM     11  OD1 ASP A   1      -9.069  23.039   2.133  0.00  0.00      A    O
ATOM     12  OD2 ASP A   1      -7.320  23.784   3.176  0.00  0.00      A    O
ATOM     13  C   ASP A   1     -11.771  24.688   3.065  0.00  0.00      A    C
ATOM     14  O   ASP A   1     -12.845  25.213   3.283  0.00  0.00      A    O
ATOM     15  N   ASP A   2     -11.531  23.422   3.336  0.00  0.00      A    N
ATOM     16  HN  ASP A   2     -10.759  23.053   2.825  0.00  0.00      A    H
ATOM     17  CA  ASP A   2     -12.607  22.475   3.723  0.00  0.00      A    C
ATOM     18  HA  ASP A   2     -13.539  22.856   3.333  0.00  0.00      A    H
ATOM     19  CB  ASP A   2     -12.234  21.037   3.248  0.00  0.00      A    C
ATOM     20  HB1 ASP A   2     -12.838  20.218   3.694  0.00  0.00      A    H
ATOM     21  HB2 ASP A   2     -11.160  20.905   3.501  0.00  0.00      A    H
ATOM     22  CG  ASP A   2     -12.483  20.961   1.754  0.00  0.00      A    C
ATOM     23  OD1 ASP A   2     -13.150  21.799   1.172  0.00  0.00      A    O
ATOM     24  OD2 ASP A   2     -11.960  20.003   1.148  0.00  0.00      A    O
ATOM     25  C   ASP A   2     -12.851  22.435   5.286  0.00  0.00      A    C
ATOM     26  O   ASP A   2     -11.904  22.782   6.076  0.00  0.00      A    O
ATOM     27  N   GLN A   3     -14.063  22.145   5.774  0.00  0.00      A    N
ATOM     28  HN  GLN A   3     -14.775  21.945   5.106  0.00  0.00      A    H
ATOM     29  CA  GLN A   3     -14.450  22.210   7.256  0.00  0.00      A    C
ATOM     30  HA  GLN A   3     -14.354  23.234   7.584  0.00  0.00      A    H
ATOM     31  CB  GLN A   3     -16.008  21.813   7.324  0.00  0.00      A    C
ATOM     32  HB1 GLN A   3     -16.329  21.391   8.301  0.00  0.00      A    H
ATOM     33  HB2 GLN A   3     -16.117  21.023   6.551  0.00  0.00      A    H
ATOM     34  CG  GLN A   3     -17.113  22.846   6.991  0.00  0.00      A    C
ATOM     35  HG1 GLN A   3     -18.010  22.221   7.188  0.00  0.00      A    H
ATOM     36  HG2 GLN A   3     -16.988  23.151   5.930  0.00  0.00      A    H
ATOM     37  CD  GLN A   3     -16.978  23.930   7.950  0.00  0.00      A    C
ATOM     38  OE1 GLN A   3     -16.700  23.653   9.121  0.00  0.00      A    O
ATOM     39  NE2 GLN A   3     -17.023  25.223   7.450  0.00  0.00      A    N
ATOM     40 HE21 GLN A   3     -16.950  25.957   8.125  0.00  0.00      A    H
ATOM     41 HE22 GLN A   3     -17.368  25.410   6.530  0.00  0.00      A    H
ATOM     42  C   GLN A   3     -13.752  21.490   8.421  0.00  0.00      A    C
ATOM     43  O   GLN A   3     -13.743  21.949   9.565  0.00  0.00      A    O
ATOM     44  N   GLN A   4     -13.079  20.324   8.179  0.00  0.00      A    N
ATOM     45  HN  GLN A   4     -13.402  19.787   7.404  0.00  0.00      A    H
ATOM     46  CA  GLN A   4     -12.496  19.571   9.290  0.00  0.00      A    C
ATOM     47  HA  GLN A   4     -13.087  19.630  10.192  0.00  0.00      A    H
ATOM     48  CB  GLN A   4     -12.529  17.994   9.047  0.00  0.00      A    C
ATOM     49  HB1 GLN A   4     -12.149  17.581  10.006  0.00  0.00      A    H
ATOM     50  HB2 GLN A   4     -11.971  17.723   8.126  0.00  0.00      A    H
ATOM     51  CG  GLN A   4     -13.961  17.466   8.759  0.00  0.00      A    C
ATOM     52  HG1 GLN A   4     -13.771  16.375   8.849  0.00  0.00      A    H
ATOM     53  HG2 GLN A   4     -14.268  17.802   7.746  0.00  0.00      A    H
ATOM     54  CD  GLN A   4     -15.021  17.975   9.765  0.00  0.00      A    C
ATOM     55  OE1 GLN A   4     -15.951  18.678   9.409  0.00  0.00      A    O
ATOM     56  NE2 GLN A   4     -14.847  17.544  11.045  0.00  0.00      A    N
ATOM     57 HE21 GLN A   4     -15.450  17.812  11.797  0.00  0.00      A    H
ATOM     58 HE22 GLN A   4     -14.030  17.028  11.301  0.00  0.00      A    H
ATOM     59  C   GLN A   4     -11.042  20.007   9.448  0.00  0.00      A    C
ATOM     60  O   GLN A   4     -10.420  19.841  10.460  0.00  0.00      A    O
ATOM     61  N   GLN A   5     -10.472  20.608   8.385  0.00  0.00      A    N
ATOM     62  HN  GLN A   5     -11.051  20.705   7.578  0.00  0.00      A    H
ATOM     63  CA  GLN A   5      -9.064  20.990   8.439  0.00  0.00      A    C
ATOM     64  HA  GLN A   5      -8.435  20.223   8.866  0.00  0.00      A    H
ATOM     65  CB  GLN A   5      -8.523  21.178   6.965  0.00  0.00      A    C
ATOM     66  HB1 GLN A   5      -7.413  21.180   6.998  0.00  0.00      A    H
ATOM     67  HB2 GLN A   5      -8.815  22.125   6.463  0.00  0.00      A    H
ATOM     68  CG  GLN A   5      -8.823  19.968   6.042  0.00  0.00      A    C
ATOM     69  HG1 GLN A   5      -8.256  20.021   5.087  0.00  0.00      A    H
ATOM     70  HG2 GLN A   5      -9.903  19.817   5.831  0.00  0.00      A    H
ATOM     71  CD  GLN A   5      -8.277  18.692   6.739  0.00  0.00      A    C
ATOM     72  OE1 GLN A   5      -7.075  18.612   7.122  0.00  0.00      A    O
ATOM     73  NE2 GLN A   5      -9.040  17.581   6.775  0.00  0.00      A    N
ATOM     74 HE21 GLN A   5      -8.750  16.758   7.261  0.00  0.00      A    H
ATOM     75 HE22 GLN A   5      -9.901  17.538   6.267  0.00  0.00      A    H
ATOM     76  C   GLN A   5      -8.725  22.282   9.088  0.00  0.00      A    C
ATOM     77  O   GLN A   5      -7.559  22.596   9.211  0.00  0.00      A    O
ATOM     78  N   GLN A   6      -9.681  22.976   9.554  0.00  0.00      A    N
ATOM     79  HN  GLN A   6     -10.616  22.676   9.379  0.00  0.00      A    H
ATOM     80  CA  GLN A   6      -9.482  24.267  10.261  0.00  0.00      A    C
ATOM     81  HA  GLN A   6      -8.623  24.830   9.928  0.00  0.00      A    H
ATOM     82  CB  GLN A   6     -10.820  25.018  10.086  0.00  0.00      A    C
ATOM     83  HB1 GLN A   6     -10.827  26.063  10.464  0.00  0.00      A    H
ATOM     84  HB2 GLN A   6     -11.687  24.528  10.579  0.00  0.00      A    H
ATOM     85  CG  GLN A   6     -11.385  25.140   8.607  0.00  0.00      A    C
ATOM     86  HG1 GLN A   6     -12.280  25.769   8.413  0.00  0.00      A    H
ATOM     87  HG2 GLN A   6     -11.651  24.100   8.319  0.00  0.00      A    H
ATOM     88  CD  GLN A   6     -10.195  25.660   7.748  0.00  0.00      A    C
ATOM     89  OE1 GLN A   6      -9.551  26.706   7.947  0.00  0.00      A    O
ATOM     90  NE2 GLN A   6      -9.827  24.871   6.717  0.00  0.00      A    N
ATOM     91 HE21 GLN A   6     -10.345  24.062   6.439  0.00  0.00      A    H
ATOM     92 HE22 GLN A   6      -9.133  25.322   6.157  0.00  0.00      A    H
ATOM     93  C   GLN A   6      -9.223  23.979  11.684  0.00  0.00      A    C
ATOM     94  O   GLN A   6      -9.825  23.059  12.191  0.00  0.00      A    O
ATOM     95  N   GLN A   7      -8.278  24.627  12.328  0.00  0.00      A    N
ATOM     96  HN  GLN A   7      -7.755  25.385  11.945  0.00  0.00      A    H
ATOM     97  CA  GLN A   7      -7.672  24.166  13.590  0.00  0.00      A    C
ATOM     98  HA  GLN A   7      -8.113  23.242  13.933  0.00  0.00      A    H
ATOM     99  CB  GLN A   7      -6.113  24.193  13.531  0.00  0.00      A    C
ATOM    100  HB1 GLN A   7      -5.674  24.100  14.548  0.00  0.00      A    H
ATOM    101  HB2 GLN A   7      -5.813  25.247  13.343  0.00  0.00      A    H
ATOM    102  CG  GLN A   7      -5.388  23.320  12.529  0.00  0.00      A    C
ATOM    103  HG1 GLN A   7      -4.283  23.289  12.636  0.00  0.00      A    H
ATOM    104  HG2 GLN A   7      -5.600  23.712  11.511  0.00  0.00      A    H
ATOM    105  CD  GLN A   7      -5.846  21.844  12.561  0.00  0.00      A    C
ATOM    106  OE1 GLN A   7      -5.712  21.007  13.452  0.00  0.00      A    O
ATOM    107  NE2 GLN A   7      -6.168  21.359  11.334  0.00  0.00      A    N
ATOM    108 HE21 GLN A   7      -6.404  20.387  11.328  0.00  0.00      A    H
ATOM    109 HE22 GLN A   7      -6.417  22.075  10.682  0.00  0.00      A    H
ATOM    110  C   GLN A   7      -8.061  25.123  14.676  0.00  0.00      A    C
ATOM    111  O   GLN A   7      -8.110  26.357  14.512  0.00  0.00      A    O
ATOM    112  N   GLN A   8      -8.233  24.614  15.947  0.00  0.00      A    N
ATOM    113  HN  GLN A   8      -7.961  23.692  16.209  0.00  0.00      A    H
ATOM    114  CA  GLN A   8      -8.604  25.336  17.137  0.00  0.00      A    C
ATOM    115  HA  GLN A   8      -8.031  26.252  17.165  0.00  0.00      A    H
ATOM    116  CB  GLN A   8     -10.217  25.428  17.272  0.00  0.00      A    C
ATOM    117  HB1 GLN A   8     -10.303  25.810  18.312  0.00  0.00      A    H
ATOM    118  HB2 GLN A   8     -10.792  24.485  17.155  0.00  0.00      A    H
ATOM    119  CG  GLN A   8     -10.831  26.507  16.359  0.00  0.00      A    C
ATOM    120  HG1 GLN A   8     -11.915  26.554  16.597  0.00  0.00      A    H
ATOM    121  HG2 GLN A   8     -10.672  26.084  15.344  0.00  0.00      A    H
ATOM    122  CD  GLN A   8     -10.307  27.970  16.565  0.00  0.00      A    C
ATOM    123  OE1 GLN A   8     -10.346  28.564  17.641  0.00  0.00      A    O
ATOM    124  NE2 GLN A   8      -9.906  28.628  15.446  0.00  0.00      A    N
ATOM    125 HE21 GLN A   8      -9.647  28.188  14.587  0.00  0.00      A    H
ATOM    126 HE22 GLN A   8      -9.738  29.595  15.639  0.00  0.00      A    H
ATOM    127  C   GLN A   8      -8.166  24.425  18.249  0.00  0.00      A    C
ATOM    128  O   GLN A   8      -8.058  23.213  18.119  0.00  0.00      A    O
ATOM    129  N   GLN A   9      -7.943  25.029  19.430  0.00  0.00      A    N
ATOM    130  HN  GLN A   9      -8.121  26.010  19.416  0.00  0.00      A    H
ATOM    131  CA  GLN A   9      -7.640  24.319  20.640  0.00  0.00      A    C
ATOM    132  HA  GLN A   9      -7.672  23.239  20.648  0.00  0.00      A    H
ATOM    133  CB  GLN A   9      -6.308  24.821  21.237  0.00  0.00      A    C
ATOM    134  HB1 GLN A   9      -6.115  24.205  22.141  0.00  0.00      A    H
ATOM    135  HB2 GLN A   9      -6.411  25.895  21.500  0.00  0.00      A    H
ATOM    136  CG  GLN A   9      -5.070  24.527  20.348  0.00  0.00      A    C
ATOM    137  HG1 GLN A   9      -5.105  25.107  19.401  0.00  0.00      A    H
ATOM    138  HG2 GLN A   9      -5.162  23.450  20.091  0.00  0.00      A    H
ATOM    139  CD  GLN A   9      -3.735  24.769  21.010  0.00  0.00      A    C
ATOM    140  OE1 GLN A   9      -3.501  25.867  21.447  0.00  0.00      A    O
ATOM    141  NE2 GLN A   9      -2.903  23.740  20.973  0.00  0.00      A    N
ATOM    142 HE21 GLN A   9      -2.019  23.972  21.379  0.00  0.00      A    H
ATOM    143 HE22 GLN A   9      -3.232  22.830  20.720  0.00  0.00      A    H
ATOM    144  C   GLN A   9      -8.689  24.593  21.732  0.00  0.00      A    C
ATOM    145  O   GLN A   9      -9.405  25.578  21.700  0.00  0.00      A    O
ATOM    146  N   GLN A  10      -8.890  23.736  22.720  0.00  0.00      A    N
ATOM    147  HN  GLN A  10      -8.371  22.887  22.781  0.00  0.00      A    H
ATOM    148  CA  GLN A  10     -10.022  23.648  23.567  0.00  0.00      A    C
ATOM    149  HA  GLN A  10     -10.660  24.507  23.423  0.00  0.00      A    H
ATOM    150  CB  GLN A  10     -10.683  22.346  23.186  0.00  0.00      A    C
ATOM    151  HB1 GLN A  10     -11.553  22.213  23.863  0.00  0.00      A    H
ATOM    152  HB2 GLN A  10     -10.041  21.446  23.297  0.00  0.00      A    H
ATOM    153  CG  GLN A  10     -11.342  22.246  21.770  0.00  0.00      A    C
ATOM    154  HG1 GLN A  10     -11.914  21.294  21.750  0.00  0.00      A    H
ATOM    155  HG2 GLN A  10     -10.605  22.348  20.944  0.00  0.00      A    H
ATOM    156  CD  GLN A  10     -12.439  23.367  21.469  0.00  0.00      A    C
ATOM    157  OE1 GLN A  10     -13.622  23.086  21.464  0.00  0.00      A    O
ATOM    158  NE2 GLN A  10     -11.998  24.564  21.128  0.00  0.00      A    N
ATOM    159 HE21 GLN A  10     -12.679  25.216  20.795  0.00  0.00      A    H
ATOM    160 HE22 GLN A  10     -11.019  24.751  21.204  0.00  0.00      A    H
ATOM    161  C   GLN A  10      -9.486  23.675  25.022  0.00  0.00      A    C
ATOM    162  O   GLN A  10      -8.307  23.454  25.309  0.00  0.00      A    O
ATOM    163  N   GLN A  11     -10.409  23.917  25.968  0.00  0.00      A    N
ATOM    164  HN  GLN A  11     -11.320  24.256  25.746  0.00  0.00      A    H
ATOM    165  CA  GLN A  11     -10.110  23.644  27.364  0.00  0.00      A    C
ATOM    166  HA  GLN A  11     -11.036  23.811  27.894  0.00  0.00      A    H
ATOM    167  CB  GLN A  11      -9.902  22.152  27.563  0.00  0.00      A    C
ATOM    168  HB1 GLN A  11      -9.288  21.976  28.471  0.00  0.00      A    H
ATOM    169  HB2 GLN A  11      -9.411  21.659  26.697  0.00  0.00      A    H
ATOM    170  CG  GLN A  11     -11.280  21.443  27.764  0.00  0.00      A    C
ATOM    171  HG1 GLN A  11     -11.192  20.338  27.843  0.00  0.00      A    H
ATOM    172  HG2 GLN A  11     -11.884  21.688  26.865  0.00  0.00      A    H
ATOM    173  CD  GLN A  11     -11.929  21.937  29.054  0.00  0.00      A    C
ATOM    174  OE1 GLN A  11     -11.154  22.360  29.951  0.00  0.00      A    O
ATOM    175  NE2 GLN A  11     -13.212  21.769  29.187  0.00  0.00      A    N
ATOM    176 HE21 GLN A  11     -13.541  21.909  30.122  0.00  0.00      A    H
ATOM    177 HE22 GLN A  11     -13.828  21.530  28.436  0.00  0.00      A    H
ATOM    178  C   GLN A  11      -9.035  24.339  28.162  0.00  0.00      A    C
ATOM    179  O   GLN A  11      -7.940  24.731  27.747  0.00  0.00      A    O
ATOM    180  N   GLN A  12      -9.222  24.491  29.455  0.00  0.00      A    N
ATOM    181  HN  GLN A  12     -10.087  24.278  29.903  0.00  0.00      A    H
ATOM    182  CA  GLN A  12      -8.247  24.953  30.381  0.00  0.00      A    C
ATOM    183  HA  GLN A  12      -7.876  25.838  29.884  0.00  0.00      A    H
ATOM    184  CB  GLN A  12      -8.797  25.458  31.766  0.00  0.00      A    C
ATOM    185  HB1 GLN A  12      -7.952  25.557  32.481  0.00  0.00      A    H
ATOM    186  HB2 GLN A  12      -9.430  24.631  32.152  0.00  0.00      A    H
ATOM    187  CG  GLN A  12      -9.584  26.801  31.775  0.00  0.00      A    C
ATOM    188  HG1 GLN A  12      -9.881  27.116  32.798  0.00  0.00      A    H
ATOM    189  HG2 GLN A  12     -10.561  26.749  31.248  0.00  0.00      A    H
ATOM    190  CD  GLN A  12      -8.856  27.914  31.057  0.00  0.00      A    C
ATOM    191  OE1 GLN A  12      -9.212  28.216  29.889  0.00  0.00      A    O
ATOM    192  NE2 GLN A  12      -7.979  28.659  31.799  0.00  0.00      A    N
ATOM    193 HE21 GLN A  12      -7.598  29.473  31.361  0.00  0.00      A    H
ATOM    194 HE22 GLN A  12      -7.763  28.560  32.771  0.00  0.00      A    H
ATOM    195  C   GLN A  12      -7.034  24.045  30.558  0.00  0.00      A    C
ATOM    196  O   GLN A  12      -7.100  22.848  30.565  0.00  0.00      A    O
ATOM    197  N   LYS A  13      -5.818  24.616  30.670  0.00  0.00      A    N
ATOM    198  HN  LYS A  13      -5.609  25.576  30.501  0.00  0.00      A    H
ATOM    199  CA  LYS A  13      -4.642  23.856  30.969  0.00  0.00      A    C
ATOM    200  HA  LYS A  13      -4.579  23.047  30.257  0.00  0.00      A    H
ATOM    201  CB  LYS A  13      -3.460  24.837  30.783  0.00  0.00      A    C
ATOM    202  HB1 LYS A  13      -3.581  25.818  31.289  0.00  0.00      A    H
ATOM    203  HB2 LYS A  13      -3.476  25.015  29.687  0.00  0.00      A    H
ATOM    204  CG  LYS A  13      -2.136  24.107  31.076  0.00  0.00      A    C
ATOM    205  HG1 LYS A  13      -2.127  23.308  30.303  0.00  0.00      A    H
ATOM    206  HG2 LYS A  13      -2.078  23.732  32.120  0.00  0.00      A    H
ATOM    207  CD  LYS A  13      -0.974  25.102  30.893  0.00  0.00      A    C
ATOM    208  HD1 LYS A  13      -0.934  25.900  31.665  0.00  0.00      A    H
ATOM    209  HD2 LYS A  13      -1.140  25.479  29.861  0.00  0.00      A    H
ATOM    210  CE  LYS A  13       0.316  24.333  30.845  0.00  0.00      A    C
ATOM    211  HE1 LYS A  13       0.299  23.529  30.078  0.00  0.00      A    H
ATOM    212  HE2 LYS A  13       0.320  23.909  31.872  0.00  0.00      A    H
ATOM    213  NZ  LYS A  13       1.470  25.179  30.643  0.00  0.00      A    N
ATOM    214  HZ1 LYS A  13       1.619  25.831  31.439  0.00  0.00      A    H
ATOM    215  HZ2 LYS A  13       2.360  24.641  30.651  0.00  0.00      A    H
ATOM    216  HZ3 LYS A  13       1.616  25.745  29.783  0.00  0.00      A    H
ATOM    217  C   LYS A  13      -4.671  23.143  32.287  0.00  0.00      A    C
ATOM    218  O   LYS A  13      -4.318  22.006  32.359  0.00  0.00      A    O
ATOM    219  N   LYS A  14      -4.998  23.903  33.287  0.00  0.00      A    N
ATOM    220  HN  LYS A  14      -5.446  24.785  33.163  0.00  0.00      A    H
ATOM    221  CA  LYS A  14      -5.022  23.381  34.613  0.00  0.00      A    C
ATOM    222  HA  LYS A  14      -4.436  22.476  34.666  0.00  0.00      A    H
ATOM    223  CB  LYS A  14      -4.242  24.281  35.498  0.00  0.00      A    C
ATOM    224  HB1 LYS A  14      -4.286  23.881  36.534  0.00  0.00      A    H
ATOM    225  HB2 LYS A  14      -4.757  25.265  35.444  0.00  0.00      A    H
ATOM    226  CG  LYS A  14      -2.804  24.366  35.060  0.00  0.00      A    C
ATOM    227  HG1 LYS A  14      -2.357  25.203  35.638  0.00  0.00      A    H
ATOM    228  HG2 LYS A  14      -2.698  24.681  34.000  0.00  0.00      A    H
ATOM    229  CD  LYS A  14      -1.958  23.185  35.382  0.00  0.00      A    C
ATOM    230  HD1 LYS A  14      -0.889  23.487  35.373  0.00  0.00      A    H
ATOM    231  HD2 LYS A  14      -2.228  22.394  34.651  0.00  0.00      A    H
ATOM    232  CE  LYS A  14      -2.120  22.566  36.821  0.00  0.00      A    C
ATOM    233  HE1 LYS A  14      -3.154  22.162  36.767  0.00  0.00      A    H
ATOM    234  HE2 LYS A  14      -1.953  23.253  37.679  0.00  0.00      A    H
ATOM    235  NZ  LYS A  14      -1.255  21.366  37.123  0.00  0.00      A    N
ATOM    236  HZ1 LYS A  14      -0.809  21.028  36.246  0.00  0.00      A    H
ATOM    237  HZ2 LYS A  14      -0.437  21.647  37.701  0.00  0.00      A    H
ATOM    238  HZ3 LYS A  14      -1.782  20.590  37.571  0.00  0.00      A    H
ATOM    239  C   LYS A  14      -6.345  23.060  35.230  0.00  0.00      A    C
ATOM    240  OT1 LYS A  14      -6.510  21.813  35.503  0.00  0.00      A    O
ATOM    241  OT2 LYS A  14      -7.169  23.904  35.501  0.00  0.00      A    O
CONECT  239  221  241  240
CONECT  221  239  223  222  219
CONECT  223  221  226  225  224
CONECT  229  232  231  230  226
CONECT  232  235  234  233  229
CONECT  226  229  228  227  223
CONECT  222  221
CONECT  224  223
CONECT  225  223
CONECT  230  229
CONECT  231  229
CONECT  233  232
CONECT  234  232
CONECT  227  226
CONECT  228  226
CONECT  220  219
CONECT  236  235
CONECT  237  235
CONECT  238  235
CONECT  219  221  220  217
CONECT  235  238  237  236  232
CONECT  240  239
CONECT  241  239
END
